# Supplementary material for: Evolutionary stability of topologically associating domains is associated with conserved gene regulation
Source: PubMed Central journal article supplement (PMC6091198; doi:10.1186/s12915-018-0556-x), 2018-08-07
Supplement: 12915_2018_556_MOESM3_ESM.pdf [file 12915_2018_556_MOESM3_ESM.pdf]

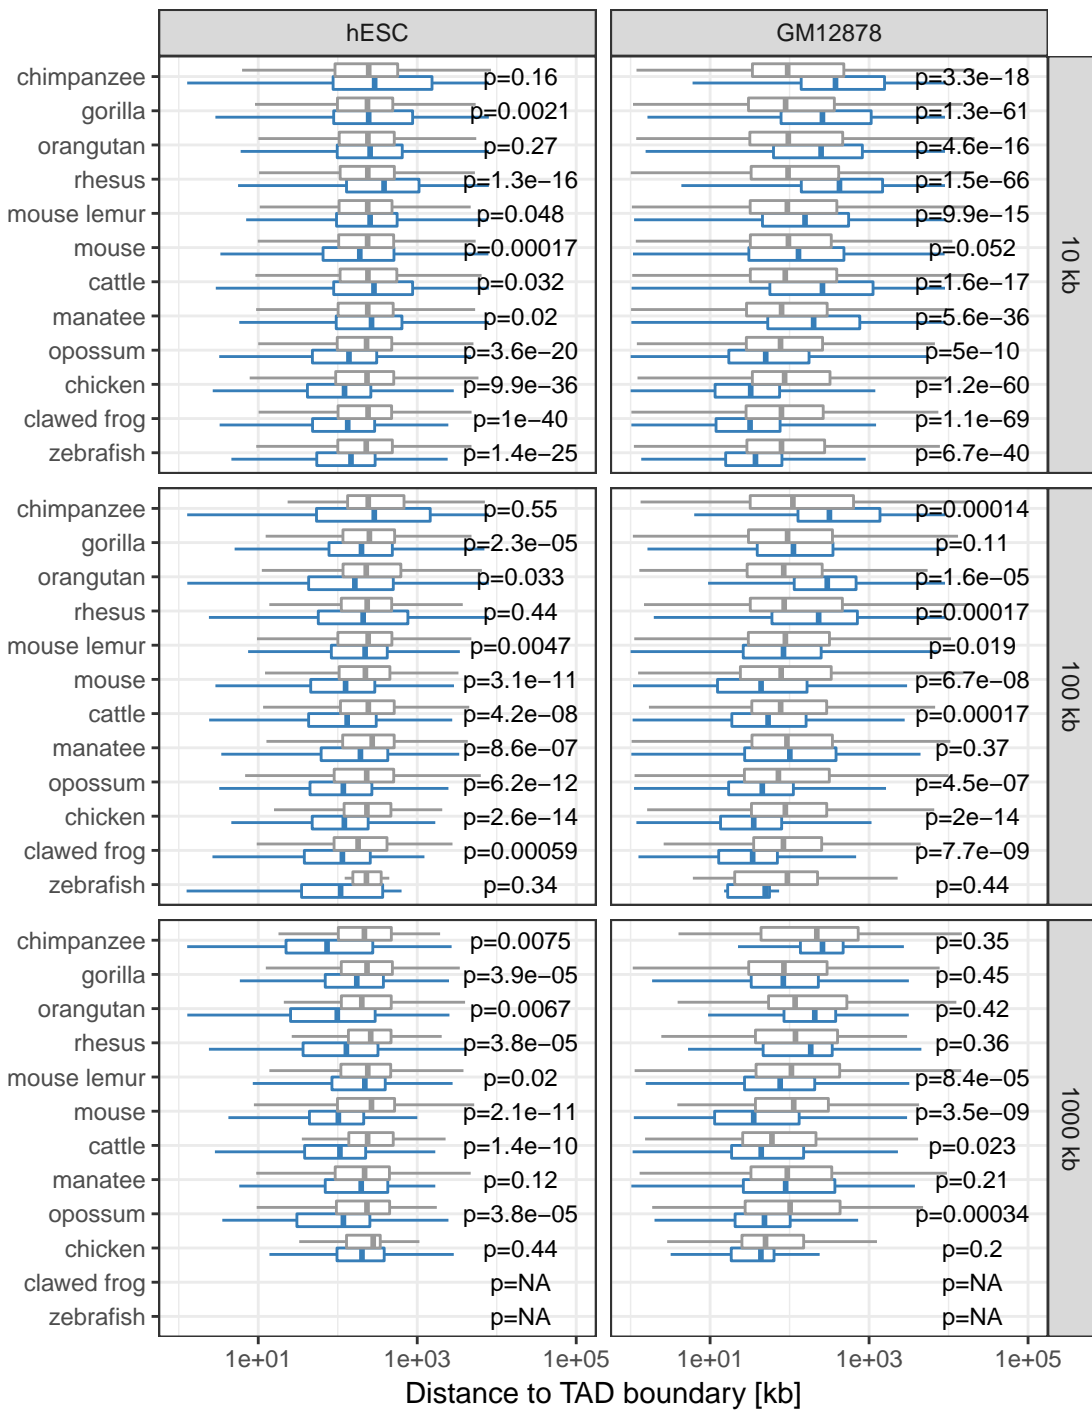

Breakpoints Background
